# Supplementary material
Source: HighWire-hosted journal article supplement (https://jech.bmj.com/content/77/8/481)
Supplement: inline-supplementary-material-1 [file inline-supplementary-material-1.pdf]

Table 1. Number of deaths from all causes in 2020-2021, and number (%) of excess deaths<sup>a</sup>, adults aged 20-64 years, by broad essential worker occupational group, January 2020 - December 2021

|              | All occupational groups |                   |             | Healthcare workers |                   |             | Social care  |                   |             | Education    |                   |             | Other essential workers |                   |             | Non-essential workers |                   |             | Unknown/Unemployed |                   |             |
|--------------|-------------------------|-------------------|-------------|--------------------|-------------------|-------------|--------------|-------------------|-------------|--------------|-------------------|-------------|-------------------------|-------------------|-------------|-----------------------|-------------------|-------------|--------------------|-------------------|-------------|
|              | Total deaths            | Excess deaths No. | (%)         | Total deaths       | Excess deaths No. | (%)         | Total deaths | Excess deaths No. | (%)         | Total deaths | Excess deaths No. | (%)         | Total deaths            | Excess deaths No. | (%)         | Total deaths          | Excess deaths No. | (%)         | Total deaths       | Excess deaths No. | (%)         |
| <b>2020</b>  |                         |                   |             |                    |                   |             |              |                   |             |              |                   |             |                         |                   |             |                       |                   |             |                    |                   |             |
| January      | 7,116                   | -134              | -1.9        | 258                | 6                 | 2.3         | 380          | 6                 | 1.6         | 160          | -11               | -6.3        | 1,156                   | -23               | -2.0        | 3,431                 | -110              | -3.1        | 1,731              | -2                | -0.1        |
| February     | 6,137                   | -181              | -2.9        | 233                | 4                 | 1.6         | 328          | -2                | -0.5        | 139          | -10               | -7.0        | 1,011                   | -27               | -2.6        | 2,899                 | -177              | -5.8        | 1,528              | 32                | 2.1         |
| March        | 7,985                   | 1,249             | 18.5        | 307                | 68                | 28.2        | 431          | 73                | 20.4        | 181          | 22                | 13.7        | 1,286                   | 226               | 21.3        | 3,735                 | 438               | 13.3        | 2,045              | 423               | 26.1        |
| April        | 10,148                  | 3,805             | 60.0        | 458                | 225               | 96.7        | 572          | 239               | 71.7        | 217          | 59                | 37.7        | 1,818                   | 790               | 76.8        | 4,560                 | 1,457             | 47.0        | 2,523              | 1,034             | 69.5        |
| May          | 7,215                   | 900               | 14.2        | 327                | 104               | 46.9        | 399          | 51                | 14.5        | 168          | 14                | 9.1         | 1,216                   | 214               | 21.4        | 3,396                 | 305               | 9.9         | 1,709              | 212               | 14.1        |
| June         | 6,280                   | 304               | 5.1         | 257                | 36                | 16.2        | 326          | 5                 | 1.5         | 132          | -15               | -10.2       | 1,039                   | 83                | 8.7         | 2,964                 | 5                 | 0.2         | 1,562              | 190               | 13.8        |
| July         | 6,274                   | 127               | 2.1         | 251                | 16                | 6.7         | 359          | 31                | 9.3         | 118          | -33               | -21.6       | 1,049                   | 55                | 5.6         | 3,046                 | 16                | 0.5         | 1,451              | 42                | 3.0         |
| August       | 6,484                   | 400               | 6.6         | 271                | 51                | 23.1        | 373          | 39                | 11.8        | 169          | 21                | 14.5        | 1,046                   | 62                | 6.3         | 3,031                 | 33                | 1.1         | 1,594              | 193               | 13.8        |
| September    | 6,211                   | 266               | 4.5         | 236                | 22                | 10.5        | 380          | 58                | 18.2        | 151          | 10                | 6.9         | 1,011                   | 39                | 4.0         | 2,956                 | 59                | 2.1         | 1,477              | 77                | 5.5         |
| October      | 7,006                   | 685               | 10.8        | 284                | 53                | 22.8        | 417          | 62                | 17.4        | 156          | 6                 | 4.0         | 1,130                   | 107               | 10.4        | 3,336                 | 263               | 8.6         | 1,683              | 194               | 13.0        |
| November     | 7,446                   | 1,107             | 17.5        | 283                | 47                | 19.7        | 485          | 137               | 39.4        | 183          | 30                | 19.5        | 1,256                   | 262               | 26.4        | 3,529                 | 396               | 12.7        | 1,710              | 235               | 15.9        |
| December     | 8,104                   | 1,139             | 16.4        | 271                | 22                | 8.7         | 505          | 139               | 37.9        | 170          | 5                 | 2.8         | 1,432                   | 314               | 28.1        | 3,763                 | 388               | 11.5        | 1,963              | 271               | 16.0        |
| <b>Total</b> | <b>86,406</b>           | <b>9,665</b>      | <b>12.6</b> | <b>3,436</b>       | <b>653</b>        | <b>23.4</b> | <b>4,955</b> | <b>838</b>        | <b>20.3</b> | <b>1,944</b> | <b>98</b>         | <b>5.3</b>  | <b>14,450</b>           | <b>2,102</b>      | <b>17.0</b> | <b>40,646</b>         | <b>3,073</b>      | <b>8.2</b>  | <b>20,976</b>      | <b>2,902</b>      | <b>16.1</b> |
| <b>2021</b>  |                         |                   |             |                    |                   |             |              |                   |             |              |                   |             |                         |                   |             |                       |                   |             |                    |                   |             |
| January      | 10,483                  | 3,233             | 44.6        | 335                | 83                | 32.8        | 699          | 325               | 86.9        | 223          | 52                | 30.6        | 1,896                   | 717               | 60.8        | 4,613                 | 1,072             | 30.3        | 2,717              | 984               | 56.8        |
| February     | 7,769                   | 1,451             | 23.0        | 283                | 54                | 23.4        | 516          | 187               | 56.7        | 151          | 2                 | 1.1         | 1,411                   | 373               | 35.9        | 3,563                 | 488               | 15.9        | 1,845              | 349               | 23.3        |
| March        | 6,819                   | 83                | 1.2         | 236                | -3                | -1.4        | 412          | 54                | 15.1        | 166          | 7                 | 4.3         | 1,122                   | 62                | 5.8         | 3,163                 | -134              | -4.1        | 1,720              | 98                | 6.0         |
| April        | 6,030                   | -313              | -4.9        | 236                | 3                 | 1.4         | 375          | 42                | 12.5        | 137          | -21               | -13.1       | 1,042                   | 14                | 1.4         | 2,820                 | -283              | -9.1        | 1,420              | -69               | -4.6        |
| May          | 6,117                   | -198              | -3.1        | 228                | 5                 | 2.4         | 375          | 27                | 7.6         | 139          | -15               | -9.7        | 989                     | -13               | -1.3        | 2,896                 | -195              | -6.3        | 1,490              | -7                | -0.5        |
| June         | 5,830                   | -146              | -2.4        | 208                | -13               | -6.0        | 331          | 10                | 3.1         | 140          | -7                | -4.8        | 969                     | 13                | 1.3         | 2,841                 | -118              | -4.0        | 1,341              | -31               | -2.3        |
| July         | 6,406                   | 259               | 4.2         | 246                | 11                | 4.6         | 388          | 60                | 18.1        | 153          | 2                 | 1.6         | 1,118                   | 124               | 12.5        | 3,052                 | 22                | 0.7         | 1,449              | 40                | 2.9         |
| August       | 6,088                   | 4                 | 0.1         | 226                | 6                 | 2.6         | 387          | 53                | 16.0        | 140          | -8                | -5.1        | 1,092                   | 108               | 11.0        | 2,918                 | -80               | -2.7        | 1,325              | -76               | -5.4        |
| September    | 6,034                   | 89                | 1.5         | 216                | 2                 | 1.1         | 372          | 50                | 15.7        | 148          | 7                 | 4.8         | 1,048                   | 76                | 7.8         | 2,958                 | 61                | 2.1         | 1,292              | -108              | -7.7        |
| October      | 6,127                   | -194              | -3.1        | 249                | 18                | 7.7         | 393          | 38                | 10.6        | 141          | -9                | -6.0        | 1,090                   | 67                | 6.5         | 2,976                 | -97               | -3.2        | 1,278              | -211              | -14.2       |
| November     | 5,860                   | -479              | -7.6        | 204                | -32               | -13.7       | 404          | 56                | 16.2        | 152          | -1                | -0.8        | 1,093                   | 99                | 10.0        | 2,817                 | -316              | -10.1       | 1,190              | -285              | -19.3       |
| December     | 4,649                   | -2,316            | -33.3       | 169                | -80               | -32.2       | 287          | -79               | -21.6       | 122          | -43               | -26.2       | 837                     | -281              | -25.1       | 2,257                 | -1,118            | -33.1       | 977                | -715              | -42.3       |
| <b>Total</b> | <b>78,212</b>           | <b>1,471</b>      | <b>1.9</b>  | <b>2,836</b>       | <b>53</b>         | <b>1.9</b>  | <b>4,939</b> | <b>822</b>        | <b>20.0</b> | <b>1,812</b> | <b>-34</b>        | <b>-1.8</b> | <b>13,707</b>           | <b>1,359</b>      | <b>11.0</b> | <b>36,874</b>         | <b>-698</b>       | <b>-1.9</b> | <b>18,044</b>      | <b>-30</b>        | <b>-0.2</b> |

<sup>a</sup> The total number of deaths in each month of 2020 and 2021 compared to the average number of deaths occurring in the same month during 2015-2019. The percentage of excess deaths is the total number of excess deaths expressed as a percentage of the five-year average.
